# Supplementary material
Source: PubMed Central journal article supplement (PMC8595322)
Supplement: mmc7.pdf [file mmc7.pdf]

*Porphyromonas*  
*Alistipes*  
*Lachnoanaerobaculum*  
*Neisseria*  
*Bacteroides*  
*Leptotrichia*  
*Eikenella*  
*Barnesiella*  
*Haemophilus*  
*Muribaculum*  
*Streptomyces*  
*Tannerella*  
*Hymenobacter*  
*Exiguobacterium*  
*Parabacteroides*  
*Prevotella*  
*Pediococcus*  
*Enterococcus*  
*Rothia*  
*Veillonella*  
*Lachnoclostridium*  
*Burkholderia*  
*Clostridium*  
*Aggregatibacter*  
*Bacillus*  
*Gemella*  
*Campylobacter*  
*Selethomonas*  
*Serratia*  
*Actinomyces*

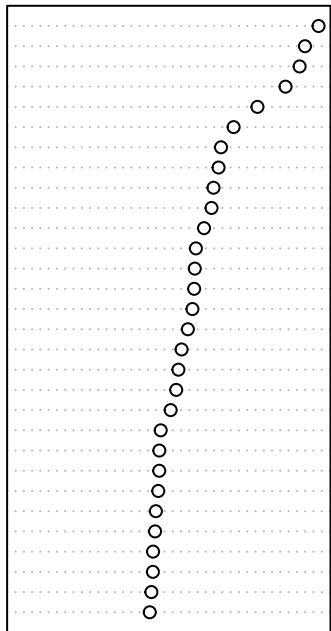

0.00

0.10

0.20

Decreased Gini value
