# Supplementary material
Source: PubMed Central journal article supplement (PMC8595322)

**A**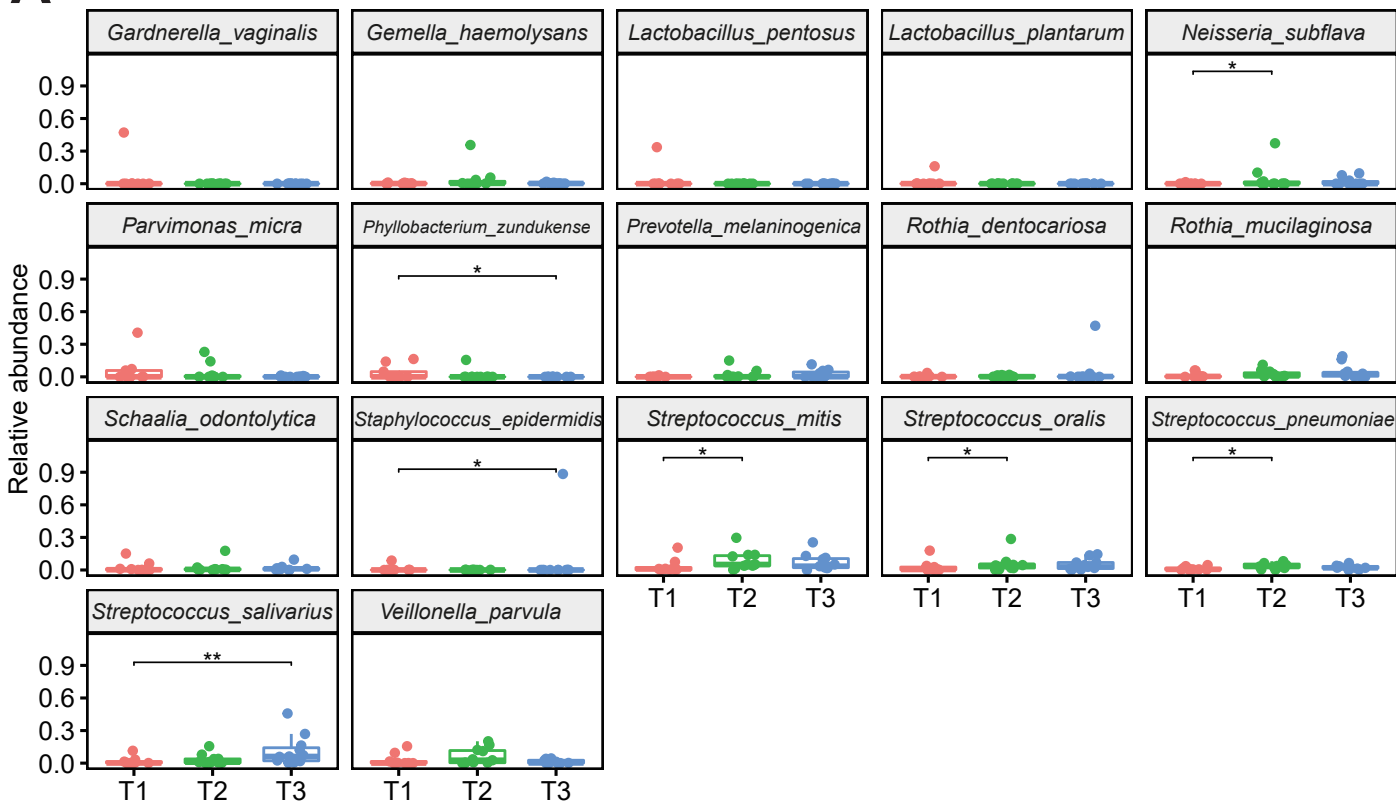**B**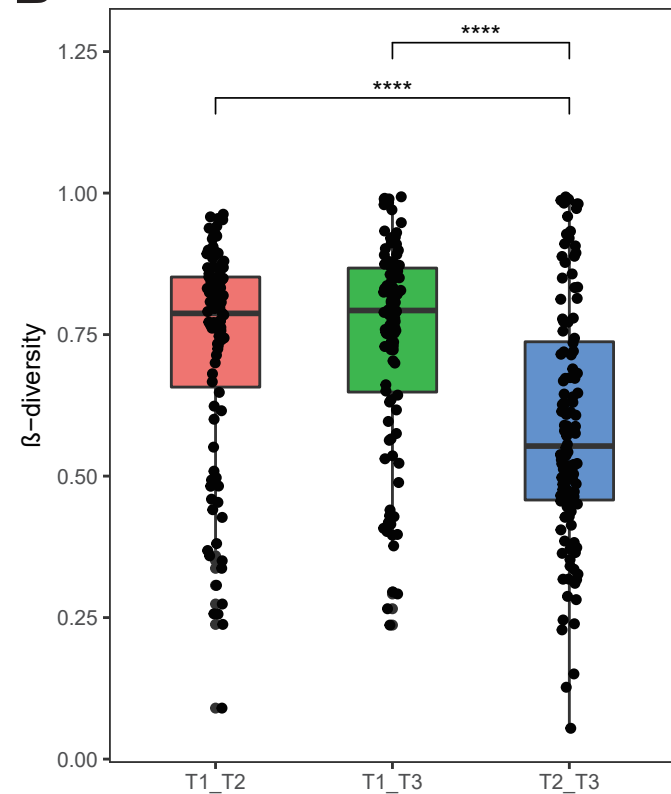

Supplement: mmc5.pdf [file mmc5.pdf]

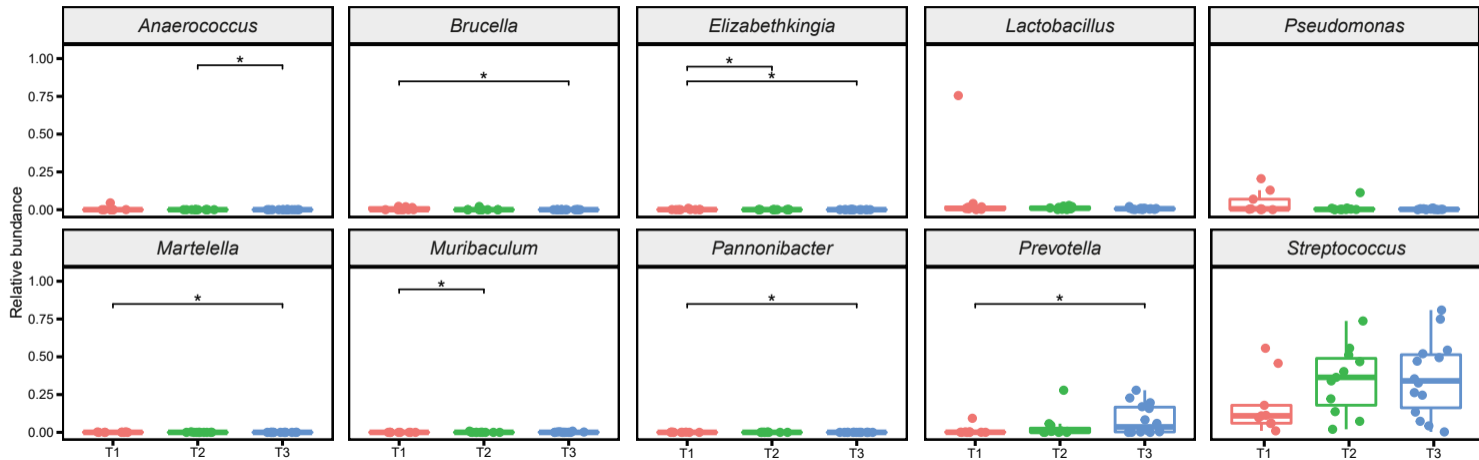

Supplement: mmc6.pdf [file mmc6.pdf]
